# Supplementary material
Source: PubMed Central journal article supplement (PMC4931882)
Supplement: supp_115.066639_Supplemental_66639.pdf [file supp_115.066639_Supplemental_66639.pdf]

**Article Title:**

Age-specific Regulation of Drug-processing Genes in Mouse Liver by Ligands of Xenobiotic-sensing Transcription Factors

**Authors:**

Cindy Yanfei Li, Helen J. Renaud, Curtis D. Klaassen and Julia Yue Cui

**Journal Title:** Drug Metabolism and Disposition

**Supplement Table 1. Primer sequences for RT-qPCR.**

| <b>Genes</b>   | <b>Forward Primer</b>     | <b>Reverse primer</b>  |
|----------------|---------------------------|------------------------|
| $\beta$ -actin | GGCCAACCGTGAAAAGATGA      | CAGCCTGGATGGCTACGTACA  |
| Cyp1a2         | GACATGGCCTAACGTGCAG       | GGTCAGAAAGCCGTGTTG     |
| Cyp2b10        | AAGGAGAAGTCCAACCAGCA      | CTCTGCAACATGGGGTACT    |
| Cyp3a11        | ACAAACAAGCAGGGATGGAC      | GGTAGAGGAGCACCAAGCTG   |
| Aldh1a1        | GGGGACAAGGCTGATGTTGA      | GCAGCCTCCTAAATCCGACA   |
| Aldh1a7        | TGCTATTTGGCTGTCCCTGT      | ACCATGTTGCGCCAGTTCTC   |
| Aldh7a1        | TGAAGAAACCATCGGGAAAG      | TTCCCCATCTCCAAAGACAC   |
| Gsta1          | CGCCACCAAATATGACCTCT      | TTGCCAATCATTTCAAGTCA   |
| Gsta4          | TGATGATGATTGCCGTGGCT      | ACGAGAAAAGCCTCTCCGTG   |
| Gstm1          | CTCCCGACTTTGACAGAAGC      | TTGCTCTGGGTGATCTTGTG   |
| Gstm2          | ATGGTTTGCAGGGAACAAGGT     | CTTCAGGCCCTCAAAGCGAC   |
| Gstm3          | AGAGGAGGAGAGGATCCGTG      | GGGACTGCAGCAGACTATCAT  |
| Gstm4          | TATGACACTGGGTTACTGGGACATC | TCCACGCGAATCTTCTCTTCC  |
| Gstt1          | CTTGCTCTACCTGGCACACA      | CTTCTCCGAAGGCCCGTATG   |
| Sult1e1        | TCCGTATGGTTCCTGGTATGA     | GTTGAACGATTCTGTCCACAAG |
| Sult5a1        | ACCTCGCTCTACTATCCGCA      | TGAAGAACTTGCCCTCGCTC   |
| Papss2         | ACCTTGGAGACCGAAGTTTT      | TTCTTGGCAACAATGAACCA   |
| Ugt1a1         | GTCATCCAAAGACTCGGGCA      | GACATTCAGGGTCACCCAG    |
| Ugt1a6         | ATACCATGGGAGCCAGAGTG      | ACCAGAACTGTGAGGGTTGG   |
| Ugt1a9         | CTGGTTCAGCCAGAGTTTTC      | TTGGCGACAATTAATCCACA   |
| Ugt2b34        | AGCTGCCAAAGCAGTCATTT      | GCCAGGATCACATCAAACCT   |
| Ugt2b35        | TGGGAAGGTGTTAGTGTGGC      | AAACTTAAGGCCCGGCGAAT   |
| Ugt2b36        | TGTGGGAAGGTGTTGGTATGG     | TCCACAGCCTTTGCAAAAATAA |
| Mrp2           | TCCTAGACAGCGGCAAGATT      | GCTAGAGCTCCGTGTGGTTC   |
| Mrp3           | TGGTCATGCTGTCAGCTTTC      | AAGGACTGAGGGGAACGAAT   |
| Mrp4           | GCAAAGCCCATGTACCATCT      | ACCACGGCTAACAACTCACC   |
| Oatp1a4        | GGAAGATTGGACACGCATCT      | GGCATTGTGACTGAAGCAGA   |
| AhR            | ACCAGAACTGTGAGGGTTGG      | CTCCCATCGTATAGGGAGCA   |
| CAR            | CTCAAGGAAAGCAGGGTCAG      | AGTTCCTCGGCCCATATTCT   |
| PXR            | CCCATCAACGTAGAGGAGGA      | TCTGAAAACCCCTTGCATC    |

**Supplement Table 2. Official Gene symbols (synonyms), full names and functions.**

| <b>Gene Symbol</b>     | <b>Full Name</b>                                            | <b>Function</b>                         |
|------------------------|-------------------------------------------------------------|-----------------------------------------|
| Actb ( $\beta$ -actin) | actin, beta                                                 | Housekeeping gene                       |
| Cyp1a2                 | cytochrome P450, family 1, subfamily a, polypeptide 2       | Phase I                                 |
| Cyp2b10                | cytochrome P450, family 2, subfamily b, polypeptide 10      | Phase I                                 |
| Cyp3a11                | cytochrome P450, family 3, subfamily a, polypeptide 11      | Phase I                                 |
| Aldh1a1                | aldehyde dehydrogenase family 1, subfamily a1               | Phase I                                 |
| Aldh1a7                | aldehyde dehydrogenase family 1, subfamily a7               | Phase I                                 |
| Aldh7a1                | aldehyde dehydrogenase family 7, member a1                  | Phase I                                 |
|                        |                                                             |                                         |
| Gsta1                  | glutathione S-transferase, alpha 1                          | Phase II                                |
| Gsta4                  | glutathione S-transferase, alpha 4                          | Phase II                                |
| Gstm1                  | glutathione S-transferase, mu 1                             | Phase II                                |
| Gstm2                  | glutathione S-transferase, mu 2                             | Phase II                                |
| Gstm3                  | glutathione S-transferase, mu 3                             | Phase II                                |
| Gstm4                  | glutathione S-transferase, mu 4                             | Phase II                                |
| Gstt1                  | glutathione S-transferase, theta 1                          | Phase II                                |
| Sult1e1                | sulfotransferase family 1E, member 1                        | Phase II                                |
| Sult5a1                | sulfotransferase family 5A, member 1                        | Phase II                                |
| Papss2                 | 3'-phosphoadenosine 5'-phosphosulfate synthase 2            | Phase II                                |
| Ugt1a1                 | UDP glucuronosyltransferase 1 family, polypeptide a1        | Phase II                                |
| Ugt1a6                 | UDP glucuronosyltransferase 1 family, polypeptide a6        | Phase II                                |
| Ugt1a9                 | UDP glucuronosyltransferase 1 family, polypeptide a9        | Phase II                                |
| Ugt2b34                | UDP glucuronosyltransferase 2 family, polypeptide b34       | Phase II                                |
| Ugt2b35                | UDP glucuronosyltransferase 2 family, polypeptide b35       | Phase II                                |
| Ugt2b36                | UDP glucuronosyltransferase 2 family, polypeptide b36       | Phase II                                |
|                        |                                                             |                                         |
| Slco1a4 (Oatp1a4)      | solute carrier organic anion transporter family, member 1a4 | Transporter                             |
| Abcc2 (Mrp2)           | ATP-binding cassette, sub-family C, member 2                | Transporter                             |
| Abcc3 (Mrp3)           | ATP-binding cassette, sub-family C, member 3                | Transporter                             |
| Abcc4 (Mrp4)           | ATP-binding cassette, sub-family C, member 4                | Transporter                             |
|                        |                                                             |                                         |
| AhR                    | aryl-hydrocarbon receptor                                   | Xenobiotic-sensing transcription factor |
| Nr1i3 (CAR)            | nuclear receptor subfamily 1, group I, member 3             | Xenobiotic-sensing transcription factor |
| Nr1i2 (PXR)            | nuclear receptor subfamily 1, group I, member 2             | Xenobiotic-sensing transcription factor |

**Supplement Table 3. Between-subjects test with significant values for age, chemical and the interaction between age and chemicals, using generalized linear model (p<0.05).**

| <b>Genes</b> | <b>Age</b> | <b>Chemical</b> | <b>Age * Chemical</b> |
|--------------|------------|-----------------|-----------------------|
| Cyp1a2       | 0.0000     | 0.0000          | <b>0.0000</b>         |
| Cyp2b10      | 0.0000     | 0.0000          | <b>0.0000</b>         |
| Cyp3a11      | 0.0000     | 0.0000          | <b>0.0000</b>         |
| Aldh1a1      | 0.0000     | 0.0000          | <b>0.0000</b>         |
| Aldh1a7      | 0.0000     | 0.0000          | <b>0.0000</b>         |
| Aldh7a1      | 0.0000     | 0.3750          | 0.8410                |
| Gsta1        | 0.0000     | 0.1040          | <b>0.0000</b>         |
| Gsta4        | 0.0000     | 0.0630          | <b>0.0280</b>         |
| Gstm1        | 0.0000     | 0.1680          | <b>0.0270</b>         |
| Gstm2        | 0.0000     | 0.2020          | 0.7300                |
| Gstm3        | 0.0000     | 0.0000          | <b>0.0050</b>         |
| Gstm4        | 0.0000     | 0.2830          | 0.1370                |
| Gstt1        | 0.0000     | 0.0040          | 0.2070                |
| Sult1e1      | 0.0030     | 0.0010          | <b>0.0000</b>         |
| Sult5a1      | 0.0000     | 0.0030          | <b>0.0010</b>         |
| Papss2       | 0.0000     | 0.0000          | <b>0.0000</b>         |
| Ugt1a1       | 0.0000     | 0.0640          | <b>0.0010</b>         |
| Ugt1a6       | 0.0000     | 0.0000          | <b>0.0000</b>         |
| Ugt1a9       | 0.0000     | 0.0020          | <b>0.0060</b>         |
| Ugt2b34      | 0.0000     | 0.0000          | <b>0.0040</b>         |
| Ugt2b35      | 0.0000     | 0.0080          | <b>0.0060</b>         |
| Ugt2b36      | 0.0000     | 0.0160          | <b>0.0050</b>         |
| Oatp1a4      | 0.0000     | 0.0000          | <b>0.0000</b>         |
| Mrp2         | 0.0000     | 0.0000          | 0.1310                |
| Mrp3         | 0.0000     | 0.4070          | <b>0.0020</b>         |
| Mrp4         | 0.0020     | 0.0000          | <b>0.0000</b>         |
| AhR          | 0.0000     | 0.0000          | <b>0.0000</b>         |
| CAR          | 0.0000     | 0.0000          | <b>0.0000</b>         |
| PXR          | 0.0000     | 0.0000          | <b>0.0000</b>         |
